# Supplementary material
Source: MDPI journal article supplement (https://www.mdpi.com/2313-0105/9/7/375)
Supplement: s1 [file s1]

# *Economic and Environmental Viability of Lithium-Ion Battery Recycling—Case Study in Two Canadian Regions with Different Energy Mixes*

Giovanna Gonzales-Calienes<sup>1±</sup>, Miyuru Kannangara<sup>1</sup>, Farid Bensebaa<sup>1±</sup>

<sup>1</sup> Energy, Mining and Environment Research Centre, National Research Council Canada, 1200 Montreal Road, Ottawa, ON, Canada, K1A 0R6

<sup>±</sup> Correspondence: giovanna.gonzalescalienes@nrc-cnrc.gc.ca (G.G.-C.); farid.bensebaa@nrc-cnrc.gc.ca (F.B.), Tel: +1-613-9931700 (G.G.-C.)

## **Supplementary information**

### **Contents**

|                 |                                |   |
|-----------------|--------------------------------|---|
| S1.             | Capital costs .....            | 2 |
| S2.             | Operating costs.....           | 3 |
| S3.             | Battery Characterization ..... | 4 |
| S4.             | Life cycle inventory .....     | 6 |
| References..... |                                | 7 |

## S1. Capital costs

A summary of the direct capital costs for the hydrometallurgical solvent extraction process plant by process area is presented in Table S1.

Table S1: Breakdown of direct cost estimate by area (CAD)

| Process area                               | Total              |
|--------------------------------------------|--------------------|
| <b>PROCESS PLANT</b>                       | <b>125,947,573</b> |
| Reagent Preparation                        | 2,390,918          |
| Black Mass Cake Re-Pulp                    | 211,515            |
| Reductive Acid Leach                       | 3,429,749          |
| Primary Neutralization                     | 2,299,887          |
| Secondary Neutralization                   | 1,571,634          |
| Mixed Hydroxide Precipitation              | 1,871,503          |
| Scavenger Precipitation                    | 908,977            |
| Manganese and Magnesium Precipitation      | 7,076,368          |
| Calcium Precipitation                      | 2,621,175          |
| Lithium Carbonate Precipitation            | 3,402,975          |
| Glauber Salt Crystallization               | 12,558,345         |
| Off-Gas Handling                           | 1,283,813          |
| Fresh and Process Water Distribution       | 361,449            |
| MHP Leaching                               | 2,378,870          |
| Mn Solvent Extraction <sup>1</sup>         | 4,218,244          |
| Co Solvent Extraction <sup>1</sup>         | 9,716,285          |
| Ni Solvent Extraction <sup>1</sup>         | 27,454,060         |
| Mn Crystallization                         | 1,504,699          |
| Co Crystallization                         | 6,020,134          |
| Ni Crystallization                         | 22,176,904         |
| Steam Generation                           | 937,090            |
| Reverse Osmosis                            | 2,293,193          |
| Miscellaneous Equipment (10% of Unit Cost) | 9,259,788          |
| <b>ANCILLARY FACILITIES</b>                | <b>174,031</b>     |
| <b>Total Direct costs</b>                  | <b>126,121,604</b> |

(1) Includes first fill of extractants and diluents

## S2. Operating costs

A summary of the operating costs for the hydrometallurgical solvent extraction process plant is presented in Table S2.

Table S2: Breakdown of operating cost

| Reagent Consumption                                    | Unit Cost                | Annual Cost  |
|--------------------------------------------------------|--------------------------|--------------|
|                                                        | CAD/t                    | CAD/y        |
| Sulphuric Acid (98 wt.%)                               | 535                      | 17,391,052   |
| Lime                                                   | 469                      | 4,733,643    |
| Sulphur Dioxide                                        | 1,540                    | 4,075,003    |
| Magnesia                                               | 469                      | 2,032,147    |
| Sodium Hydroxide (pellets)                             | 870                      | 469,884      |
| Sodium Carbonate (100 wt.%)                            | 870                      | 15,910,450   |
| Flocculant                                             | 4,217                    | 20,081       |
| Fresh Water Makeup                                     | 3                        | 198,128      |
| Makeup DEHPA                                           | 13,588                   | 921,026      |
| Makeup C272                                            | 56,426                   | 1,317,281    |
| Makeup Diluent                                         | 1,352                    | 950,477      |
| Miscellaneous Consumables (5% of total reagent cost)   |                          | 2,240,984    |
| <b>Shipping and disposal</b>                           | <b>CAD/t</b>             | <b>CAD/y</b> |
| Manganese sulfate packaging and shipping               | 268                      | 93,709       |
| Cobalt sulfate packaging and shipping                  | 268                      | 1,024,106    |
| Nickel sulfate packaging and shipping                  | 268                      | 4,307,937    |
| Li <sub>2</sub> CO <sub>3</sub> packaging and shipping | 268                      | 852,752      |
| Reductive acid leach residue disposal                  | 27                       | 235,611      |
| Primary neutralization residue disposal                | 27                       | 192,773      |
| Manganese and magnesium precipitation residue          | 27                       | 720,221      |
| Mixed hydroxide precipitation leaching residue         | 27                       | 49,532       |
| Glauber Salt                                           | 27                       | 1,848,745    |
|                                                        | <b>CAD/m<sup>3</sup></b> | <b>CAD/y</b> |
| Natural Gas                                            | 0.17                     | 99,064       |
|                                                        | <b>CAD/kWh</b>           | <b>CAD/y</b> |
| Power                                                  | 0.12                     | 2,621,175    |
| Labour                                                 |                          | 12,041,607   |
| Maintenance and Supplies (2.5% Direct Cost)            |                          | 3,152,639    |
| Contingency (10%)                                      |                          | 7,749,734    |

### S3. Battery Characterization

The LIB cathode chemistry and battery design have evolved in recent years toward higher specific energy and lower cobalt content. The updated bill of materials and cathode materials of EV LIB chemistries from the GREET model were used [1]. The EV LIB chemistry selected for this LCA study is  $\text{LiNi}_{0.8}\text{Mn}_{0.1}\text{Co}_{0.1}\text{O}_2$  (NMC811).

The battery characteristics of this EV LIB pack is based on Dai et al.'s, 2019a, study and Argonne's Battery Performance and Cost (BatPaC) Model [2] that is shown in Table S 3. Detailed material compositions at the cell, module, and pack levels are presented in Table S 4 [3].

Table S 3: Battery technical characteristics of the two selected LIB chemistries [2, 3]

| Technical Characteristics  | NMC 811       |                                                                      |
|----------------------------|---------------|----------------------------------------------------------------------|
|                            | Amount        | Units                                                                |
| Functional unit            | 1             | kg of BEV battery pack                                               |
| LIB anode chemistry        | Graphite      |                                                                      |
| LIB cathode chemistry      | NMC           | $\text{Li}(\text{Ni}_{0.8}\text{Mn}_{0.1}\text{Co}_{0.1})\text{O}_2$ |
| Nominal voltage, cell      | 3.75          | V                                                                    |
| Nominal capacity, pack     | 23.5          | kWh                                                                  |
| Number of cells            | 164           | cells                                                                |
| Type of cell               | Prismatic-811 |                                                                      |
| Weight of the cells        | 132           | kg                                                                   |
| Weight of the battery pack | 158           | kg                                                                   |
| Energy density—cell level  | 178           | Wh/kg                                                                |
| Energy density—pack level  | 149           | Wh/kg                                                                |
| Weight one cell            | 0.803         | kg                                                                   |
| Energy one cell            | 0.143         | kwh                                                                  |

Table S 4: Mass contribution of NMC 111 and NMC 811 EV LIB batteries [3]

| Cell components                              | NMC 811<br>(kg) | Total mass<br>contribution<br>(%) |
|----------------------------------------------|-----------------|-----------------------------------|
| Active cathode material                      | 34.93           | 22.2%                             |
| Graphite                                     | 23.15           | 14.7%                             |
| Carbon black                                 | 1.94            | 1.2%                              |
| Binder (PVDF)                                | 4.01            | 2.5%                              |
| Copper                                       | 17.65           | 11.2%                             |
| Aluminum                                     | 9.25            | 5.9%                              |
| Electrolyte: LiPF <sub>6</sub>               | 2.89            | 1.8%                              |
| Electrolyte: Ethylene Carbonate              | 8.07            | 5.1%                              |
| Electrolyte: Dimethyl Carbonate              | 8.07            | 5.1%                              |
| Plastic: Polypropylene                       | 1.68            | 1.1%                              |
| Plastic: Polyethylene                        | 0.39            | 0.2%                              |
| Plastic: Polyethylene Terephthalate          | 0.34            | 0.2%                              |
| <b>Subtotal: Cell</b>                        | <b>112.37</b>   | <b>71%</b>                        |
| <b>Module components excluding cell</b>      |                 |                                   |
| Copper                                       | 0.44            | 0.3%                              |
| Aluminum                                     | 7.15            | 4.5%                              |
| Plastic: Polyethylene                        | 0.18            | 0.1%                              |
| Thermal Insulation                           | 0.11            | 0.1%                              |
| Electronic part                              | 1.12            | 0.7%                              |
| <b>Subtotal: Module without cells</b>        | <b>9</b>        | <b>5.7%</b>                       |
| <b>Pack components without module</b>        |                 |                                   |
| Copper                                       | 0.09            | 0.1%                              |
| Aluminum                                     | 22.29           | 14.1%                             |
| Steel                                        | 1.01            | 0.6%                              |
| Thermal Insulation                           | 0.69            | 0.4%                              |
| Coolant: Glycol                              | 7.3             | 4.6%                              |
| Electronic part -BMS                         | 4.93            | 3.1%                              |
| <b>Subtotal: Battery pack without module</b> | <b>36.31</b>    | <b>23.0%</b>                      |
| <b>Total: Battery pack</b>                   | <b>157.68</b>   | <b>100%</b>                       |

## S4. Life cycle inventory

Life cycle inventories are provided in the NRC collaboration server, which can be accessed using the following URL.

[https://eeec.nrc-cnrc.gc.ca/openlca/NRC\\_CNRC/Lithium Battery Recycling Pathways Public/datasets](https://eeec.nrc-cnrc.gc.ca/openlca/NRC_CNRC/Lithium_Battery_Recycling_Pathways_Public/datasets)

A short description of each dataset and its inputs and outputs are described. The datasets can be download as either JSON-LD or ILCD formats, which permits their importation into commonly used LCA software such as OpenLCA. Table S5 shows the provided inventories in the NRC collaboration server.

Table S5: Life cycle inventories included in the NRC collaboration server repository.

| Process                                      | Inventory name                                                                                                                                                       |
|----------------------------------------------|----------------------------------------------------------------------------------------------------------------------------------------------------------------------|
| Black mass treatment                         | black mass treatment, solvent extraction, hydrometallurgical process; at plant; NMC 811 battery cell type (Geographies Ca-ON and Ca-QC)                              |
| Cathode active material production           | cathode active material; production using calcination of recycled precursor; at plant; NMC 811 battery cell type (Geographies Ca-ON and Ca-QC)                       |
| Precursor cathode active material production | lithium nickel cobalt manganese hydroxide; production using co-precipitation of recycled sulfates; at plant; NMC 811 battery cell type (Geographies Ca-ON and Ca-QC) |
| Lithium hydroxide production                 | lithium hydroxide; production from recycled lithium carbonate; at plant; NMC 811 cell type (Geographies Ca-ON and Ca-QC)                                             |

It should be noted that the Ecoinvent database is required for cradle-to-gate impact assessment using the above LCI datasets. When using openLCA, users must first import the Ecoinvent database into an empty database and then import the above datasets to establish correct flow and provider connections. Both Ecoinvent and openLCA reference impact assessment methods can be used for impact assessment.

## References

1. Dai, Q., et al., *Update of Bill-of-materials and Cathode Materials Production for Lithium-ion Batteries in the GREET Model* 2018, Argonne National Laboratory.
2. Dai, Q., et al., *EverBatt: A Closed-loop Battery Recycling Cost and Environmental Impacts Model*. 2019b, Argonne National Laboratory. p. 88.
3. Dai, Q., et al., *Life Cycle Analysis of Lithium-Ion Batteries for Automotive Applications*. Batteries, 2019a. **5**(2): p. 48.
